# Supplementary material
Source: PubMed Central journal article supplement (PMC3459465)
Supplement: supp_dds284_dds284supp.pdf [file supp_dds284_dds284supp.pdf]

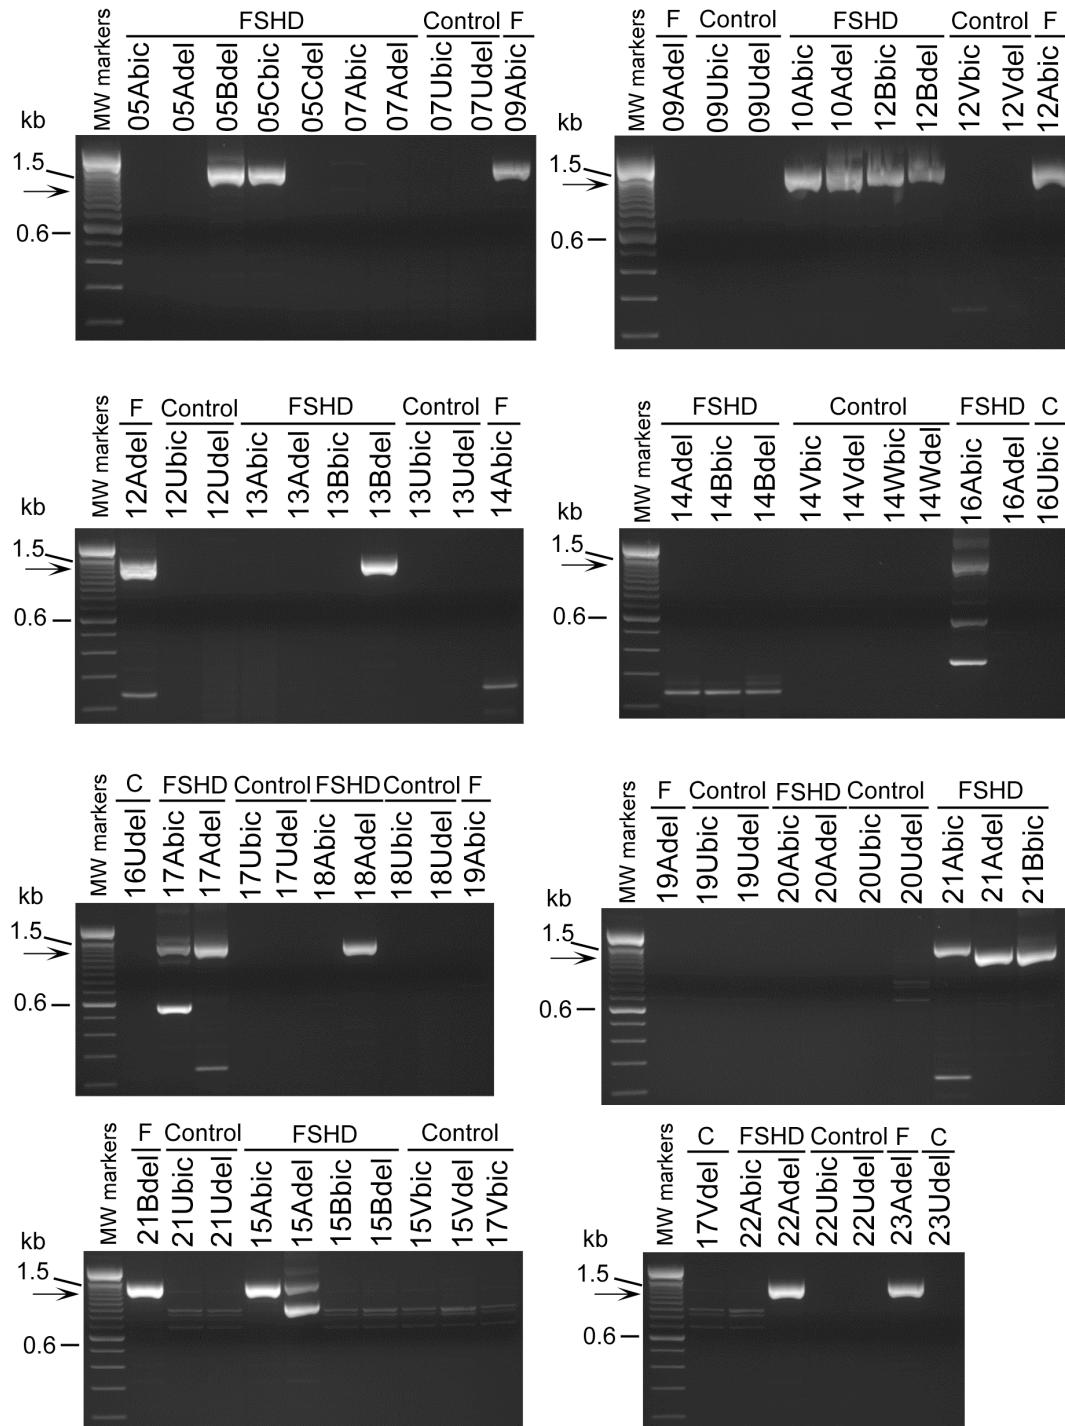

**Figure S1: DUX4-fl mRNA expression in biopsies detected at 55 PCR cycles.** Polyadenylated DUX4-fl mRNA was detected from biopsy mRNA using nested RT-PCR (25 cycles followed by 30 nested cycles). DUX4-fl mRNA was expressed in 22 out of 45 FSHD biopsies and 1 out of 34 control biopsies (Figure 3; cohort 03). Sequencing confirmed spliced DUX4-fl mRNA expression (arrows). One of three independent replicate experiments is shown.

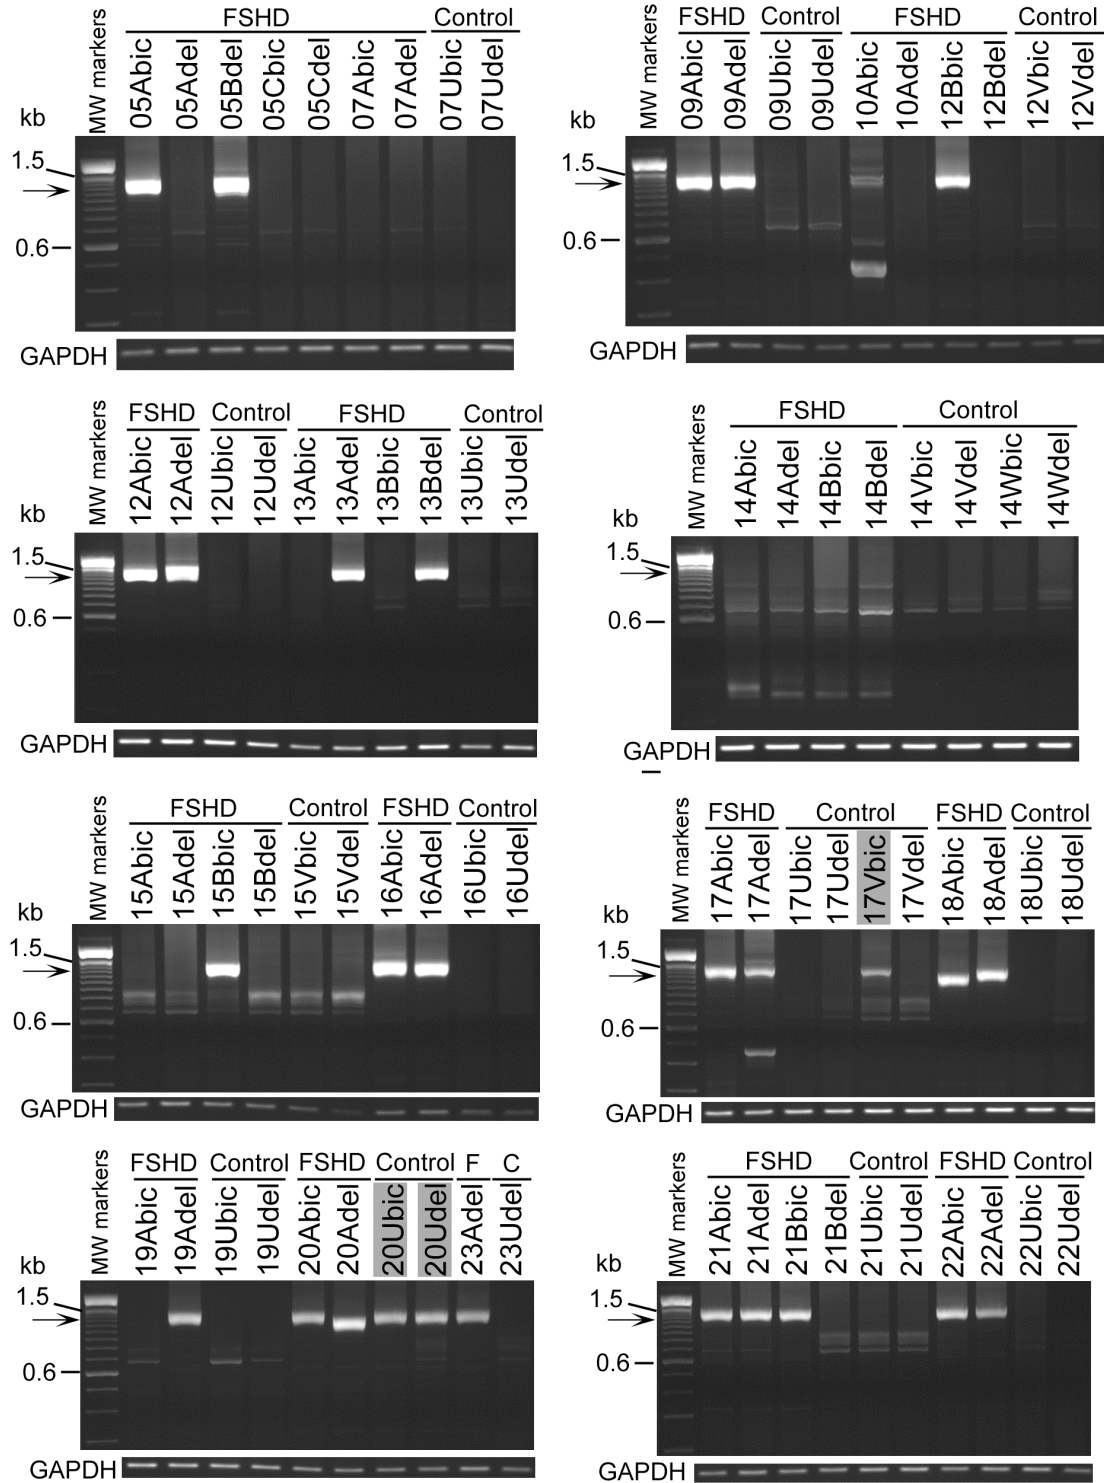

**Figure S2: Polyadenylated DUX4-fl expression in biopsies detected at 65 PCR cycles.** Nested RT-PCR (25 cycles followed by 40 nested cycles) from biopsy mRNA. Sequencing confirmed spliced DUX4-fl mRNA expression (arrows) was detectable in 3 out of 33 unaffected biopsies (gray boxes; 17Vbic, 20Ubic, 20Udel) from two control individuals (17U, 20U) and 26 out of 44 FSHD biopsies. Gray shading indicates DUX4-fl expression in control biopsies. One of two independent replicate experiments is shown.

**Table S1: Summary of individual DUX4-fl assays**

| Control Subjects    | RT-PCR Day 0 | RT-PCR Day 4 | RT-PCR Biopsy (55)   | RT-PCR Biopsy (65) | DUX4-FL ICC | 4qA (kb) <i>EcoRI/BlnI</i> |
|---------------------|--------------|--------------|----------------------|--------------------|-------------|----------------------------|
| 03Udel              | -            | -----        | nd                   | nd                 | +           | >112                       |
| 03Ubic              | -            | -----        | --                   | -                  | -           | >112                       |
| 07Udel              | --           | + -          | ---                  | --                 | +           | 53                         |
| 07Ubic              | --           | + -          | ---                  | --                 | -           | 53                         |
| 09Udel              | --           | -            | ---                  | --                 | -           | >112                       |
| 09Ubic              | --           | -            | ---                  | --                 | +           | >112                       |
| 12Udel              | - + -        | + + +        | ---                  | --                 | +           | >112                       |
| 12Ubic              | --           | --           | ---                  | --                 | -           | >112                       |
| 12Vdel              | nd           | nd           | ---                  | --                 | nd          | >112                       |
| 12Vbic              | nd           | nd           | ---                  | --                 | nd          | >112                       |
| 13Udel <sup>a</sup> | nd           | nd           | ---                  | --                 | nd          | none                       |
| 13Ubic <sup>a</sup> | nd           | nd           | ---                  | --                 | nd          | none                       |
| 14Vdel              | nd           | nd           | ---                  | --                 | nd          | 60                         |
| 14Vbic              | nd           | nd           | ---                  | --                 | nd          | 60                         |
| 14Wdel <sup>a</sup> | nd           | nd           | ---                  | --                 | nd          | 4qB only                   |
| 14Wbic <sup>a</sup> | nd           | nd           | ---                  | --                 | nd          | 4qB only                   |
| 15Vdel <sup>a</sup> | -            | ---          | --                   | --                 | -           | 4qB only                   |
| 15Vbic <sup>a</sup> | -            | ---          | --                   | --                 | -           | 4qB only                   |
| 16Udel              | ---          | +++          | ---                  | --                 | -           | 93                         |
| 16Ubic              | ---          | +++          | ---                  | --                 | +           | 93                         |
| 17Udel              | nd           | nd           | -----                | --                 | nd          | >112                       |
| 17Ubic              | nd           | nd           | -----                | --                 | nd          | >112                       |
| 17Vdel              | -----        | - + - - - -  | -----                | --                 | +           | 90                         |
| 17Vbic              | -----        | -----        | - + - - - -<br>----- | - +                | -           | 90                         |
| 18Udel <sup>a</sup> | ---          | ---          | ---                  | --                 | -           | 4qB only                   |
| 18Ubic <sup>a</sup> | ---          | ---          | ---                  | --                 | -           | 4qB only                   |
| 19Udel              | nd           | nd           | ---                  | --                 | nd          | 79                         |
| 19Ubic              | nd           | nd           | ---                  | --                 | nd          | 79                         |
| 20Udel              | -----        | +++++        | ---                  | - +                | -           | 39                         |
| 20Ubic              | + - + - - -  | + + + - - -  | ---<br>- + - - - -   | - +                | -           | 39                         |
| 21Udel              | nd           | nd           | ---                  | --                 | nd          | >112                       |
| 21Ubic              | nd           | nd           | ---                  | --                 | nd          | >112                       |
| 22Udel              | nd           | nd           | ---                  | --                 | nd          | >112                       |
| 22Ubic              | nd           | nd           | ---                  | --                 | nd          | >112                       |
| 23Udel              | nd           | nd           | ---                  | --                 | nd          | 45                         |

| FSHD Subjects | RT-PCR Day 0 | RT-PCR Day 4 | RT-PCR Biopsy (55) | RT-PCR Biopsy (65) | DUX4-FL ICC | 4qA (kb) Eco/Bln |
|---------------|--------------|--------------|--------------------|--------------------|-------------|------------------|
| 03Adel        | -            | + - + - +    | nd                 | nd                 | -           | 20               |
| 03Abic        | + - +        | - + + - +    | ++                 | +                  | +           | 20               |
| 05Adel        | nd           | nd           | ++-                | --                 | nd          | 25               |
| 05Abic        | nd           | nd           | ---                | -+                 | nd          | 25               |
| 05Bdel        | + - -        | +++          | +++                | ++                 | nd          | 25               |
| 05Cdel        | nd           | nd           | ++-                | --                 | nd          | 25               |
| 05Cbic        | ---          | +++          | ---                | +-                 | -           | 25               |
| 07Adel        | --+          | ---          | ---                | --                 | +           | 29               |
| 07Abic        | --           | ++-          | ---                | --                 | +           | 29               |
| 09Adel        | ++           | +            | -+-                | -+                 | +           | 25               |
| 09Abic        | ++           | +            | +-                 | ++                 | +           | 25               |
| 10Adel        | nd           | nd           | ++-                | +-                 | nd          | 24               |
| 10Abic        | nd           | nd           | -++                | ++                 | nd          | 24               |
| 12Adel        | +++          | +++          | +++                | ++                 | +           | 18               |
| 12Abic        | + -          | - +          | + - -              | ++                 | +           | 18               |
| 12Bdel        | nd           | nd           | - - +              | +-                 | nd          | 18               |
| 12Bbic        | nd           | nd           | +++                | ++                 | +           | 18               |
| 13Adel        | nd           | nd           | +++                | -+                 | nd          | nd               |
| 13Abic        | nd           | nd           | ---                | --                 | nd          | nd               |
| 13Bdel        | nd           | nd           | + - +              | ++                 | nd          | 16               |
| 13Bbic        | nd           | nd           | + - +              | --                 | nd          | 16               |
| 14Adel        | nd           | nd           | ---                | --                 | nd          | 19               |
| 14Abic        | nd           | nd           | ---                | --                 | nd          | 19               |
| 14Bdel        | nd           | nd           | ---                | --                 | nd          | 19               |
| 14Bbic        | nd           | nd           | ---                | --                 | nd          | 19               |
|               |              |              | -----              |                    |             |                  |
| 15Adel        | -            | --+          | --                 | +-                 | -           | 28               |
| 15Abic        | --+          | ---          | ++                 | +-                 | +           | 28               |
| 15Bdel        | -            | ---          | -+                 | --                 | +           | 28               |
| 15Bbic        | -+           | + - +        | + -                | --                 | +           | 28               |
|               |              |              | -----              |                    |             |                  |
| 16Adel        | +++          | +++          | -++                | -+                 | +           | 20               |
| 16Abic        | --+--        | +++          | +++                | ++                 | +           | 20               |
| 17Adel        | +++          | +++          | ++++               | ++                 | +           | 19               |
| 17Abic        | ---          | +++          | ++++<br>+++++      | ++                 | +           | 19               |
| 18Adel        | +++          | +++          | -+-                | ++                 | +           | 21               |
| 18Abic        | ---          | +++          | -++                | -+                 | +           | 21               |
| 19Adel        | nd           | nd           | -+-                | -+                 | nd          | 22               |
| 19Abic        | nd           | nd           | ---                | --                 | nd          | 22               |
|               |              |              | ++++--             |                    |             |                  |
| 20Adel        | + - -        | +++          | -++                | -+                 | +           | 20               |
| 20Abic        | ++-          | +++          | ---                | -+                 | +           | 20               |

|        |       |       |              |     |    |    |
|--------|-------|-------|--------------|-----|----|----|
| 21Adel | nd    | nd    | +++          | ++  | nd | 26 |
| 21Abic | nd    | nd    | -++          | ++  | nd | 26 |
| 21Bdel | nd    | nd    | + - +        | + - | nd | 26 |
| 21Bbic | nd    | nd    | - ++         | ++  | nd | 26 |
| 22Adel | nd    | nd    | ++ -         | ++  | nd | 27 |
| 22Abic | nd    | nd    | ---          | - + | nd | 27 |
| 23Adel | nd    | nd    | - - +        | ++  | nd | 18 |
| 27Adel | ---   | ---   | nd           | nd  | -  | 12 |
| 27Abic | ---   | + + - | ---          | nd  | -  | 12 |
|        |       |       | -----        |     |    |    |
| 27Bdel | + - - | ---   | ---          | nd  | -  | 12 |
|        |       |       | -----        |     |    |    |
| 27Bbic | ---   | ---   | ---          | nd  | -  | 12 |
| 28Adel | + - - | +++   | ---          | nd  | +  | 29 |
| 28Abic | - - + | +++   | - ++         | nd  | +  | 29 |
| 28Bdel | - - + | +++   | nd           | nd  | +  | 29 |
| 28Bbic | - + - | +++   | + - -        | nd  | +  | 29 |
| 29Adel | - ++  | +++   | - ++         | nd  | +  | 30 |
| 29Abic | + - + | +++   | +++<br>+++++ | nd  | +  | 30 |
| 29Bdel | +++   | +++   | ---          | nd  | +  | 30 |
|        |       |       | +-----       |     |    |    |
| 29Bbic | +++   | +++   | + - -        | nd  | +  | 30 |
| 30Adel | ---   | +++   | - + -        | nd  | nd | 30 |
| 30Abic | ---   | +++   | +++          | nd  | nd | 30 |
| 30Bdel | +++   | +++   | ---          | nd  | nd | 32 |
| 30Bbic | +++   | +++   | ---          | nd  | nd | 32 |

 = DUX4-fl expression from unaffected subject

For RT-PCRs, each + or – reflects the result of one repetition

nd = not determined

<sup>a</sup> no 4qA alleles detected

For ICC, cells are classified as + if one or more nucleus shows a positive immunostaining for DUX4-FL protein
